# Supplementary material
Source: PubMed Central journal article supplement (PMC7453892)
Supplement: jciinsight-5-139287-s240.pdf [file jciinsight-5-139287-s240.pdf]

1 **Supplemental Methods:**

2 T cell counts were performed using Tritest Reagent with Trucount Tubes and analyzed on a  
3 FACSCalibur platform (BD Biosciences).

4 Viral Loads: Plasma RNA was extracted using the Abbott Sample Preparation System, amplified  
5 using Real Time HIV-1 Amplification Reagent Kits (Abbott Molecular, Des Plaines, IL), and run  
6 on the M2000 Realtime System (Abbott) with a lower limit of detection of 40 copies/ml.

7 QVOA: rCD4 (CD4+/CD69-/CD25-/HLA-DR-) were isolated from PBMCs using two steps of  
8 negative-selection, plated at limiting dilution, and activated with PHA and  $\gamma$ -irradiated allogenic  
9 PBMCs. If the number of CD4+ cells were low after the first isolation, total CD4 counts were  
10 plated. Released virus was expanded using MOLT-4 CCR5+ (NIH AIDS reagent program).  
11 Culture supernatants were examined for the presence of actively growing virus using a p24  
12 ELISA (PerkinElmer) after 14-21 days (1). Infectious units per million rCD4 cells (IUPM) were  
13 calculated using IUPMStats (2). If all culture wells were negative for viral outgrowth, the median  
14 posterior estimate of infected cell frequency was used.

15 Total HIV DNA was quantified by quantitative PCR (qPCR) for a segment of the gag gene, using  
16 a previously published protocol adapted for qPCR (3, 4). DNA was extracted from rCD4 cells  
17 using the AllPrep DNA/RNA minikit (Qiagen, Valencia, CA) and amplified by qPCR using the  
18 TaqMan Fast Advanced Master Mix (Thermo Fisher Scientific, Waltham, MA) and gag targeted  
19 primers with the following cycling conditions: 2 minute UNG incubation at 50°C, 20 second  
20 enzyme activation at 95°C, 50 cycles of a 1 second denaturation at 95°C followed by 20  
21 seconds of annealing/extension at 60°C. The host cell RNase P/MRP 30-kDa-subunit gene  
22 (RPP30) was amplified using the same conditions with respective primers. *gag* copy numbers

23 were calculated as the mean of triplicate qPCR measurements and were normalized to  $1 \times 10^6$   
24 rCD4, as determined by RPP30 (which appears in 2 copies/cell) (4).

25 HIV-1 subtyping was determined from historical data or performed by next-generation amplicon  
26 sequencing of viral RNA from wells positive for p24 in the QVOA, using reverse transcriptase  
27 (RT) and gp41-targeted primers, as described previously (5). Subtypes for reverse transcriptase  
28 (RT) and gp41 were determined phylogenetically, or, if phylogenetic analyses were unclear,  
29 using the NCBI HIV subtyping tool  
30 (<https://www.ncbi.nlm.nih.gov/projects/genotyping/formpage.cgi>). Individuals with both RT and  
31 gp41 regions identified as the same subtype were classified with a pure subtype, and those with  
32 divergent calls were classified as recombinants.

33 Soluble Immune Analytes: An 8-plex custom Human Ultra-Sensitive kit was used to quantify:  
34 IFN-2 $\alpha$  (lower limit of quantification (LLOQ) 4.88pg/ml), IL10 (LLOQ 0.62pg/ml), IL15 (LLOQ  
35 1.5pg/ml), IL6 (LLOQ 0.28pg/ml), IL7 (LLOQ 0.42pg/ml), MIG/CXCL9 (78.12pg/ml LLOQ ),  
36 MIP3 $\alpha$ /CCL19 (19.54pg/ml LLOQ ), and MIP3 $\beta$ /CCL20 (LLOQ 4.88pg/ml). Additional analytes  
37 were measured individually: D-dimer (LLOQ 47.5ng/ml), sCD14 (LLOQ 1.25ng/ml), IP10 (LLOQ  
38 7.8pg/ml), CRP (LLOQ 78.0ng/ml), and CCL21 (LLOQ 32.76pg/ml). Plates were imaged using  
39 the Sector Imager 2400A platform.

40 Flow Cytometry: Antibodies and fluorophores (clone, manufacturer) used were as follows: CD3  
41 APC-H7 (Sk7, BD Biosciences), CD4 APC-R700 (RPA-T4, BD Biosciences), CD45RO PerCP-  
42 Cy5-5 (UCHL1, BD Biosciences), CD28 PE-CF594 (CD28-2, BD Biosciences), CCR7 BV711  
43 (G043H7, Biolegend), CD57 BB515 (NK-1, BD Biosciences), HLA-DR BV510 (G46-6, BD  
44 Biosciences), CD38 BV605 (HB7, BD Biosciences), CD69 BV421 (FN50 BD Biosciences), Ki-67  
45 eFluor660 (20Raj1, eBiosciences), FoxP3 PE (PCH101, eBiosciences, CD25 BV786 (M-A251,  
46 BD Biosciences); and one to assess T cell effector function, including markers of T cell

47 exhaustion (CD3, CD4, CD8 BB515 (RPA-T8, BD Biosciences), CD107a AF647 (H4A3, BD  
48 Biosciences), Perforin BV421 (B-D48, Biolegend), IFN $\gamma$  PerCP-Cy5.5 (B27, BD Biosciences),  
49 TNF BV785 (Mab11, Biolegend), IL2 BV510 (5344-111, BD Biosciences), Tim3 PE (344823,  
50 R&D Systems), CTLA4 PE-CF594 (BNI3, BD Biosciences), PD1 BV605 (EH12-1, BD  
51 Biosciences). Both panels included a viability dye (LIVE/DEAD Fixable Blue Dead Cell Stain Kit,  
52 Invitrogen).

53 PBMCs were thawed, resuspended at  $1 \times 10^6$  viable cells/ml (trypan blue) in R10 (RPMI 1640  
54 media supplemented with: 10% heat-inactivated FBS, 10U/ml penicillin, 10 $\mu$ g/ml streptomycin,  
55 250ng/ml amphotericin B, and 2mM L-Glutamine) and rested overnight under normal growth  
56 conditions (37°C, 5% CO $_2$ , humidified atmosphere). The following morning 100 $\mu$ l cell  
57 suspension was plated in a round bottom 96-well plate for stimulation and/or staining. To assess  
58 cytokine production, one well per participant was stimulated with 1ng/ml phorbol-12-myristate-  
59 13-acetate (PMA) and 1 $\mu$ g/ml ionomycin and one well with vehicle (0.1% DMSO), both for 3  
60 hours under normal growth conditions and in the presence of 10 $\mu$ g/ml Brefeldin A, 0.7 $\mu$ g/ml  
61 monensin, and anti-CD107a antibody. Cells for CD4 T cell phenotyping were left unstimulated.  
62 All samples were then washed with PBS, stained with viability dye for 30 minutes at room  
63 temperature, and washed twice more. Cells were then stained with fluorochrome-labeled  
64 antibodies against surface antigens in the presence of 2% FBS in PBS for 30 minutes at room  
65 temperature. Excess surface antibody was removed by washing with 2% FBS in PBS. Samples  
66 for the assessment of T cell phenotype were permeabilized using the eBioscience  
67 fixation/permeabilization solution for Treg identification, while samples for the assessment of  
68 effector functions were permeabilized with the BD Cytotfix/Cytoperm solution (BD Biosciences).  
69 Cells were washed in the appropriate permeabilization wash buffer and stained with antibodies  
70 against intracellular antigens.

71 Samples were acquired using an LSRII flow cytometer (BD Systems) and data analysis  
72 performed using FlowJo (version 10.6.1, Becton Dickinson). Representative gating images are  
73 shown in Supplementary Figure 3.

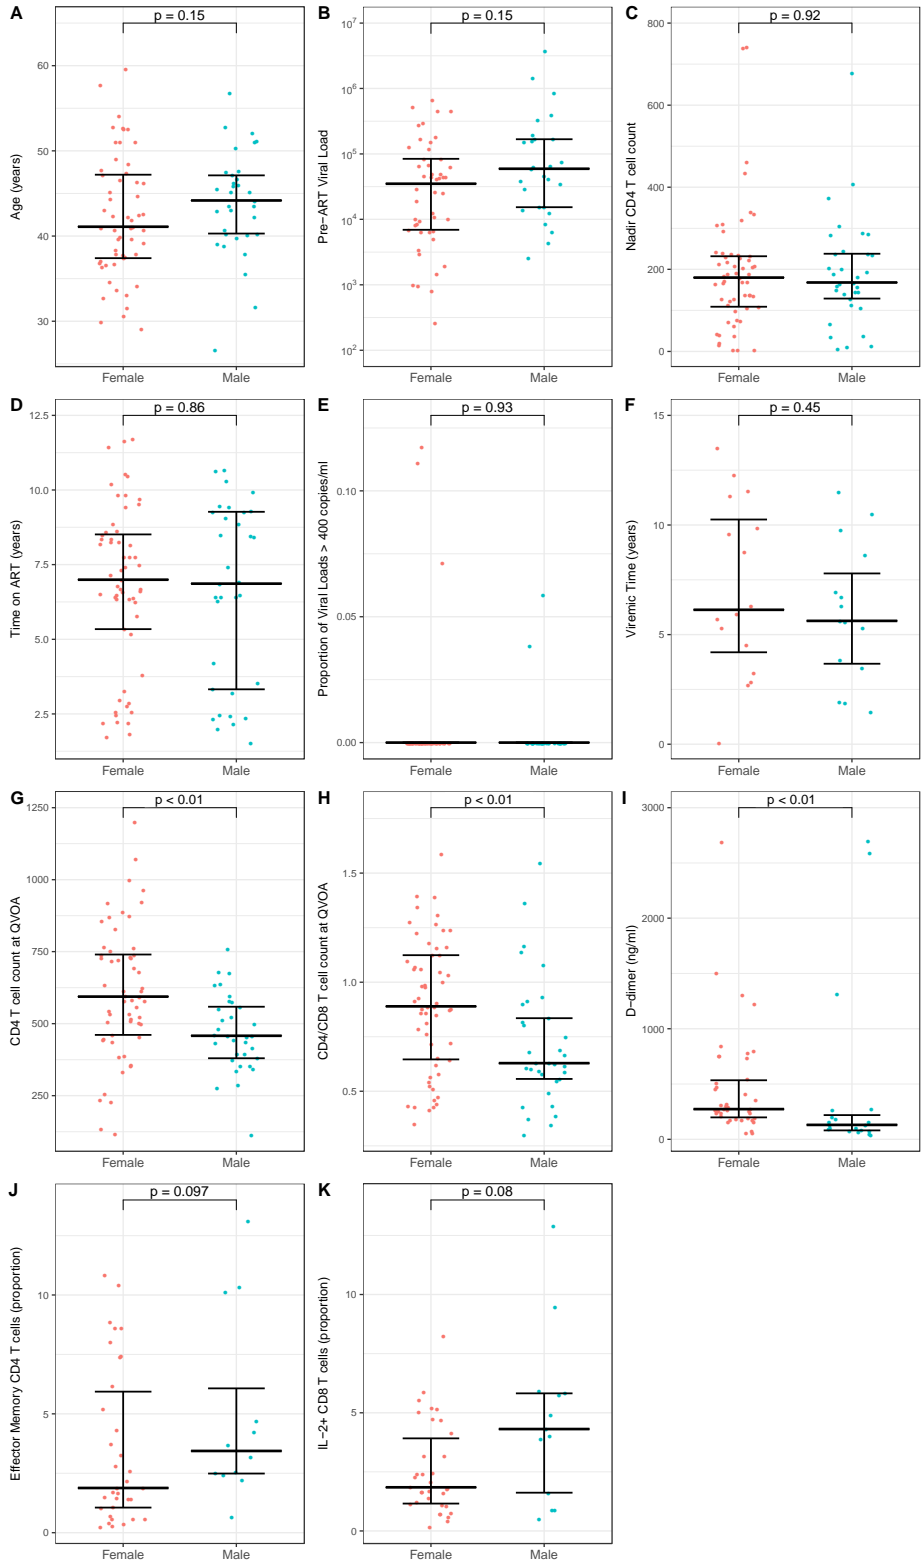

74

75 **Supplemental Figure 1: Participant clinical and immunological characteristics, by sex.**

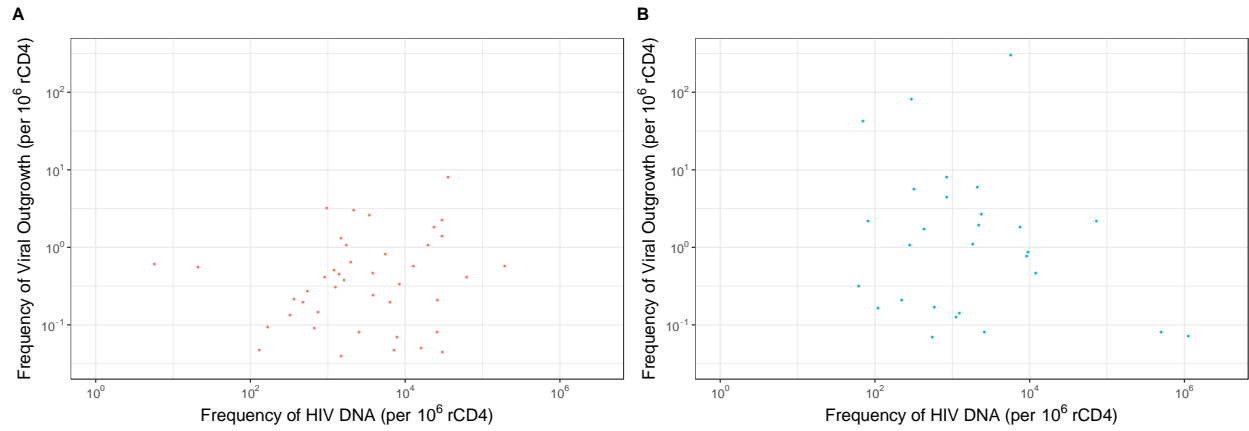

76

77

**Supplemental Figure 2:** No correlation between QVOA and qPCR estimates of the frequency

78

of persistently infected resting CD4 T cells (rCD4), in either females (**A**) or males (**B**). QVOA:

79

Quantitative Viral Outgrowth Assay (QVOA); qPCR: quantitative PCR for total HIV DNA.

**Supplemental Figure 3: Flow cytometry gating strategy and representative plots**

**A. Flow cytometry panel 1: CD4 T cell subsets and activation status**

**CD4 T Cell Identification**

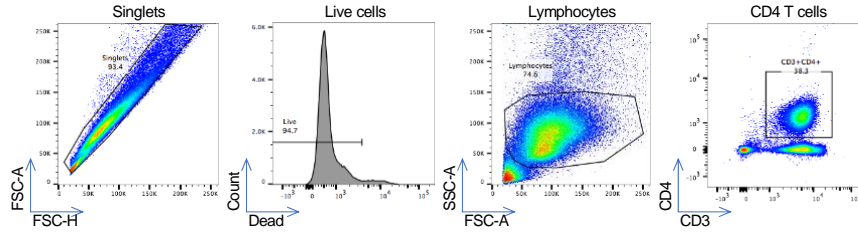

**CD4 T Cell Memory Subsets**

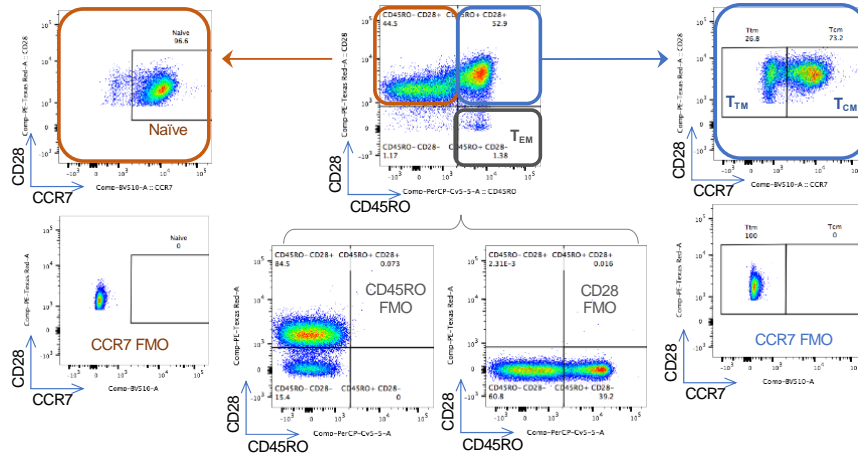

**CD4 T Cell Activation**

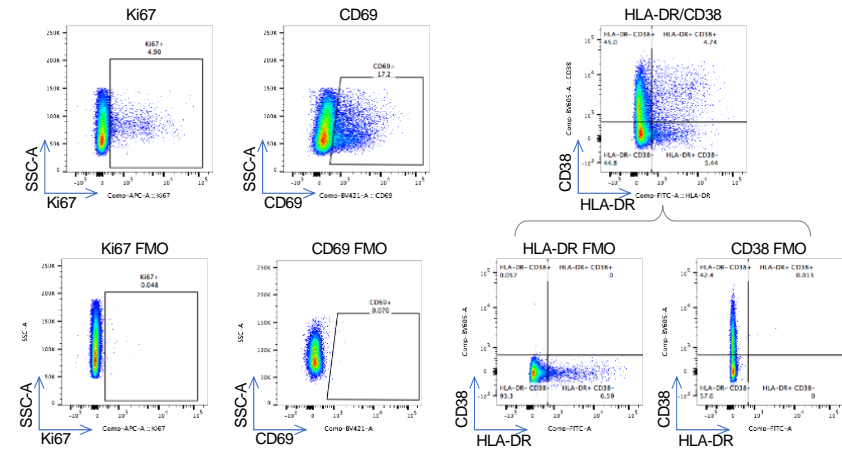

**Regulatory T cells (Treg)**

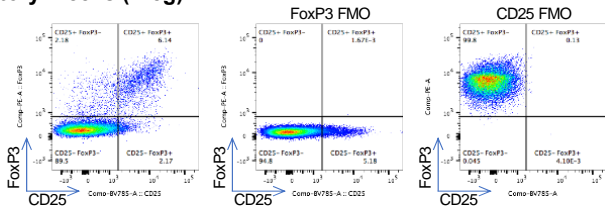

## B. Flow cytometry panel 2: CD4 and CD8 T cell immune exhaustion (using unstimulated cells)

### CD4 and CD8 T Cell Identification

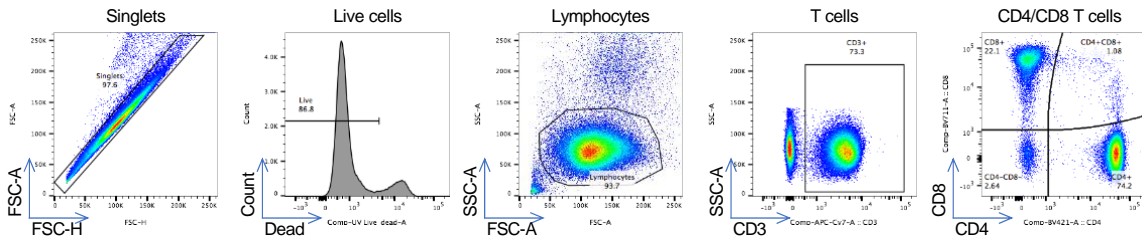

### CD8 T Cell Exhaustion

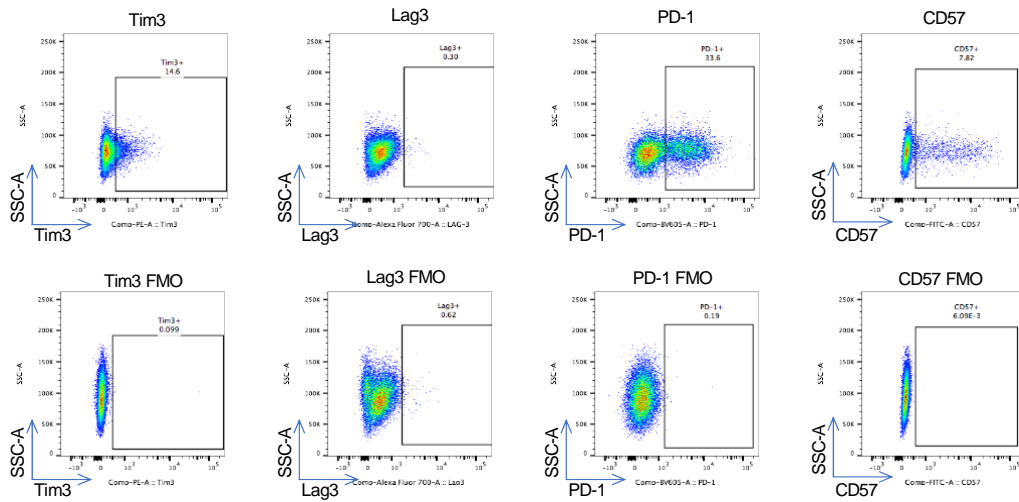

### CD4 T Cell Exhaustion

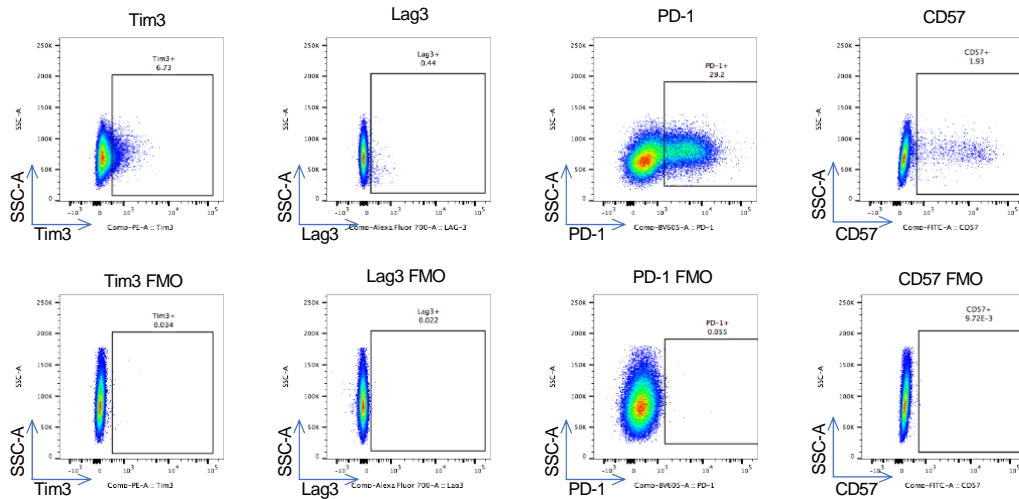



### C. Flow cytometry panel 2: CD4 and CD8 T cell immune function

#### CD4 and CD8 T Cell Identification (3hrs PMA/iono stimulation)

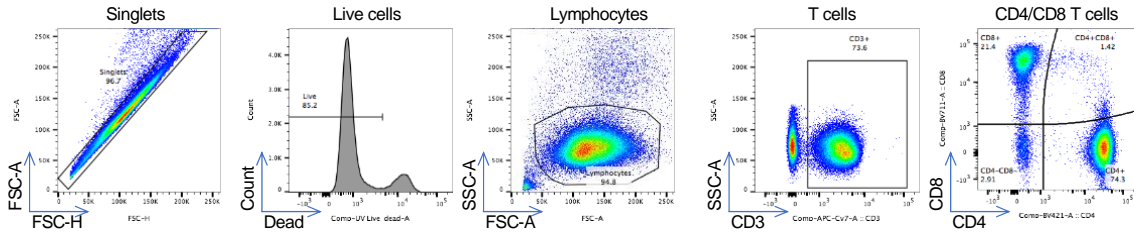

#### CD8 T Cell Effector Function

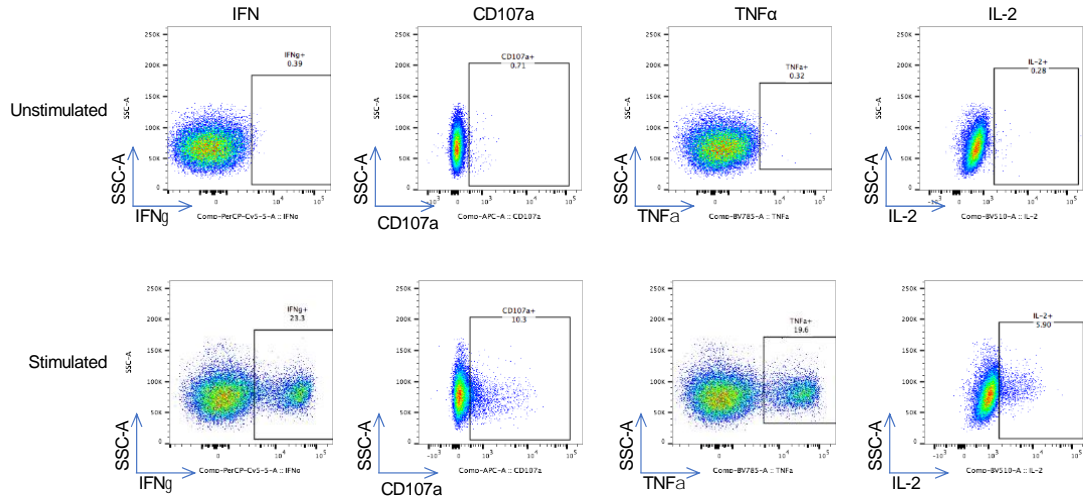

#### CD4 T Cell Effector Function

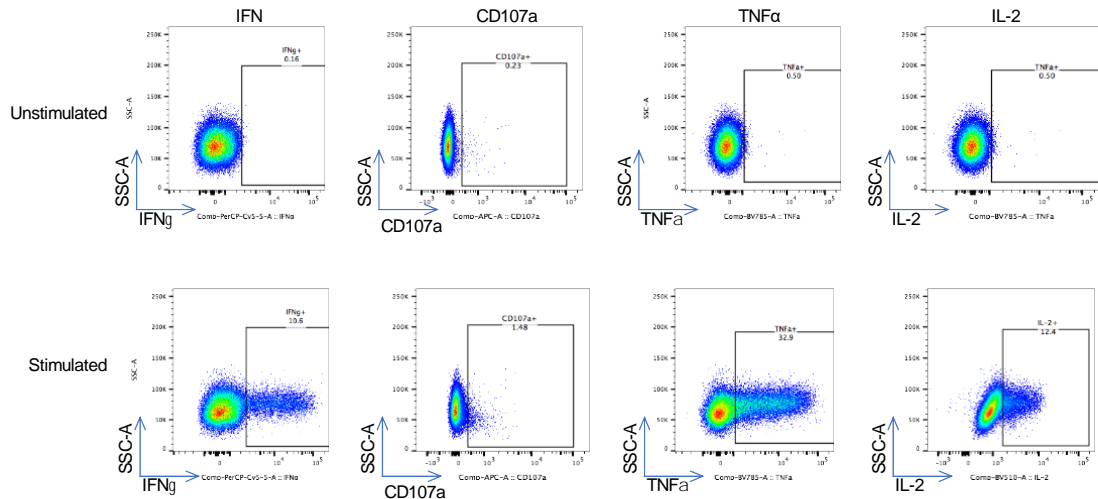

85

86

87 **Supplementary Table 1.** Univariate regression analysis of immunological variables on reservoir  
 88 outgrowth (IUPM), including both males and females.

|                                                                                  | <b>Immune Characteristic</b>       | <b>Median (IQR)</b>  | <b>Regression Coefficient</b> | <b>P-value</b> |
|----------------------------------------------------------------------------------|------------------------------------|----------------------|-------------------------------|----------------|
| <b>Soluble Immune Analytes (log<sub>10</sub> pg/ml, unless stated otherwise)</b> | IL-7                               | 0.6<br>(0.4, 0.8)    | 0.20                          | 0.44           |
|                                                                                  | IL-15                              | 0.5<br>(0.4, 0.5)    | -0.31                         | 0.61           |
|                                                                                  | CRP (log <sub>10</sub> ng/ml)      | 3.2<br>(2.7, 3.6)    | -0.05                         | 0.70           |
|                                                                                  | D-dimer (log <sub>10</sub> ng/ml)  | 2.4<br>(2.2, 2.7)    | -0.07                         | 0.72           |
|                                                                                  | IL-10 (binary)                     | 0.3<br>(0.2, 0.6)    | 0.00                          | 1.00           |
|                                                                                  | IL-6                               | -0.1<br>(-0.3, 0.0)  | -0.15                         | 0.63           |
|                                                                                  | IP10                               | 2.0<br>(1.9, 2.2)    | -0.00                         | 0.99           |
|                                                                                  | CCL21                              | 2.3<br>(1.5, 2.7)    | 0.07                          | 0.63           |
|                                                                                  | MIG                                | 2.6<br>(2.4, 2.8)    | -0.11                         | 0.70           |
|                                                                                  | MIP-3 $\alpha$ (binary)            | 0.8<br>(0.7, 1.0)    | 0.07                          | 0.67           |
|                                                                                  | MIP-3 $\beta$                      | 1.9<br>(1.8, 2.0)    | -0.17                         | 0.74           |
| <b>T cell subsets (proportion of CD3+ cells)</b>                                 | CD4+                               | 51.7<br>(42.5, 60.4) | -0.00                         | 0.72           |
|                                                                                  | CD8+                               | 41.1<br>(33.3, 51.9) | 0.00                          | 0.57           |
| <b>CD4 T cell memory subsets (proportion of CD4 T cells)</b>                     | Naïve (CD28+/CD45RO-/CCR7+)        | 45.3<br>(32.3, 54.9) | -0.00                         | 0.69           |
|                                                                                  | Central (CD28+/CD45RO+/CCR7+)      | 34.0<br>(24.7, 42.6) | 0.00                          | 0.80           |
|                                                                                  | Effector (CD28-/CD45RO+/CCR7-)     | 2.5<br>(1.4, 5.9)    | 0.02                          | 0.49           |
|                                                                                  | Transitional (CD28+/CD45RO+/CCR7-) | 7.7<br>(5.5, 13.0)   | 0.02                          | 0.22           |
| <b>CD4 T cell activation (proportion of CD4 T cells)</b>                         | CD69                               | 15.8<br>(11.6, 19.6) | 0.01                          | 0.39           |
|                                                                                  | HLA-DR+/CD38+                      | 2.3<br>(1.5, 3.4)    | 0.00                          | 0.97           |
|                                                                                  | CD69+/Ki-67+                       | 0.3<br>(0.2, 0.4)    | 0.41                          | 0.26           |
|                                                                                  | CD69- /Ki-67+                      | 1.7<br>(1.1, 2.2)    | 0.03                          | 0.62           |

|                                                                   |                                    |                      |       |      |
|-------------------------------------------------------------------|------------------------------------|----------------------|-------|------|
|                                                                   | Ki-67+                             | 1.9<br>(1.5, 2.6)    | 0.03  | 0.55 |
|                                                                   | T regulatory cells                 | 1.9<br>(1.4, 2.7)    | 0.06  | 0.46 |
| <b>T cell exhaustion: summary subsets (proportion of parent)</b>  | CD57+ CD4 T cells                  | 2.8<br>(1.6, 5.6)    | 0.04  | 0.18 |
|                                                                   | Lag-3+ CD4 T cells                 | 1.6<br>(1.0, 2.8)    | -0.04 | 0.54 |
|                                                                   | PD-1+ CD4 T cells                  | 27.8<br>(19.5, 33.4) | 0.01  | 0.12 |
|                                                                   | Tim-3+ CD4 T cells                 | 2.7<br>(1.8, 3.9)    | -0.03 | 0.47 |
|                                                                   | CD57+ CD8 T cells                  | 27.6<br>(15.7, 35.4) | 0.01  | 0.13 |
|                                                                   | Lag-3+ CD8 T cells                 | 0.5<br>(0.3, 0.7)    | 0.30  | 0.25 |
|                                                                   | PD-1+ CD8 T cells                  | 21.1<br>(14.9, 25.8) | -0.01 | 0.63 |
|                                                                   | Tim-3+ CD8 T cells                 | 10.4<br>(6.7, 15.3)  | 0.01  | 0.46 |
| <b>T cell exhaustion: specific subsets (proportion of parent)</b> | CD57-/Lag3-/PD1-/Tim3- CD4 T cells | 68.3<br>(61.9, 75.5) | -0.01 | 0.13 |
|                                                                   | CD57-/Lag3-/PD1-/Tim3+ CD4 T cells | 1.4<br>(0.7, 2.0)    | -0.07 | 0.21 |
|                                                                   | CD57-/Lag3-/PD1+/Tim3- CD4 T cells | 22.2<br>(16.8, 27.8) | 0.01  | 0.14 |
|                                                                   | CD57-/Lag3-/PD1+/Tim3+ CD4 T cells | 0.7<br>(0.5, 1.2)    | 0.05  | 0.75 |
|                                                                   | CD57-/Lag3+/PD1-/Tim3- CD4 T cells | 1.4<br>(0.7, 2.2)    | -0.03 | 0.58 |
|                                                                   | CD57-/Lag3+/PD1-/Tim3+ CD4 T cells | 0.01<br>(0.00, 0.01) | -9.13 | 0.41 |
|                                                                   | CD57-/Lag3+/PD1+/Tim3- CD4 T cells | 0.2<br>(0.1, 0.3)    | -0.12 | 0.86 |
|                                                                   | CD57-/Lag3+/PD1+/Tim3+ CD4 T cells | 0.02<br>(0.01, 0.03) | -0.47 | 0.62 |
|                                                                   | CD57+/Lag3-/PD1-/Tim3- CD4 T cells | 0.5<br>(0.3, 1.4)    | 0.02  | 0.78 |
|                                                                   | CD57+/Lag3-/PD1-/Tim3+ CD4 T cells | 0.04<br>(0.02, 0.08) | 0.05  | 0.93 |
|                                                                   | CD57+/Lag3-/PD1+/Tim3- CD4 T cells | 1.6<br>(1.1, 4.0)    | 0.06  | 0.10 |
|                                                                   | CD57+/Lag3-/PD1+/Tim3+ CD4 T cells | 0.08<br>(0.03, 0.21) | 0.12  | 0.50 |
|                                                                   | CD57+/Lag3+/PD1-/Tim3- CD4 T cells | 0.01<br>(0.00, 0.02) | -4.50 | 0.18 |
|                                                                   | CD57+/Lag3+/PD1-/Tim3+ CD4 T cells | 0.00<br>(0.00, 0.00) | -6.93 | 0.79 |
| CD57+/Lag3+/PD1+/Tim3- CD4 T cells                                | 0.01<br>(0.00, 0.02)               | -0.11                | 0.97  |      |

|                                                                          |                                    |                      |       |      |
|--------------------------------------------------------------------------|------------------------------------|----------------------|-------|------|
|                                                                          | CD57+/Lag3+/PD1+/Tim3+ CD4 T cells | 0.00<br>(0.00, 0.01) | -4.06 | 0.81 |
|                                                                          | CD57-/Lag3-/PD1-/Tim3- CD8 T cells | 51.2<br>(41.9, 61.0) | -0.01 | 0.27 |
|                                                                          | CD57-/Lag3-/PD1-/Tim3+ CD8 T cells | 5.3<br>(2.8, 9.8)    | 0.00  | 0.91 |
|                                                                          | CD57-/Lag3-/PD1+/Tim3- CD8 T cells | 12.2<br>(9.1, 16.3)  | -0.03 | 0.12 |
|                                                                          | CD57-/Lag3-/PD1+/Tim3+ CD8 T cells | 0.8<br>(0.5, 1.5)    | 0.11  | 0.32 |
|                                                                          | CD57-/Lag3+/PD1-/Tim3- CD8 T cells | 0.2<br>(0.1, 0.3)    | 0.21  | 0.62 |
|                                                                          | CD57-/Lag3+/PD1-/Tim3+ CD8 T cells | 0.03<br>(0.01, 0.04) | 3.05  | 0.40 |
|                                                                          | CD57-/Lag3+/PD1+/Tim3- CD8 T cells | 0.09<br>(0.05, 0.17) | 0.85  | 0.33 |
|                                                                          | CD57-/Lag3+/PD1+/Tim3+ CD8 T cells | 0.01<br>(0.00, 0.02) | 12.78 | 0.07 |
|                                                                          | CD57+/Lag3-/PD1-/Tim3- CD8 T cells | 17.1<br>(9.6, 22.9)  | 0.01  | 0.13 |
|                                                                          | CD57+/Lag3-/PD1-/Tim3+ CD8 T cells | 2.0<br>(0.8, 3.3)    | 0.02  | 0.48 |
|                                                                          | CD57+/Lag3-/PD1+/Tim3- CD8 T cells | 5.2<br>(3.0, 7.5)    | 0.02  | 0.42 |
|                                                                          | CD57+/Lag3-/PD1+/Tim3+ CD8 T cells | 0.5<br>(0.3, 1.3)    | 0.05  | 0.57 |
|                                                                          | CD57+/Lag3+/PD1-/Tim3- CD8 T cells | 0.05<br>(0.02, 0.08) | 2.79  | 0.09 |
|                                                                          | CD57+/Lag3+/PD1-/Tim3+ CD8 T cells | 0.00<br>(0.00, 0.02) | 11.23 | 0.17 |
|                                                                          | CD57+/Lag3+/PD1+/Tim3- CD8 T cells | 0.04<br>(0.02, 0.06) | 2.19  | 0.31 |
|                                                                          | CD57+/Lag3+/PD1+/Tim3+ CD8 T cells | 0.00<br>(0.00, 0.01) | 8.11  | 0.36 |
| <b>T cell effector functions: summary subsets (proportion of parent)</b> | CD107+ CD4 T cells                 | 4.4<br>(2.4, 9.3)    | 0.02  | 0.22 |
|                                                                          | IFN $\gamma$ + CD4 T cells         | 6.7<br>(2.9, 10.6)   | 0.02  | 0.13 |
|                                                                          | IL-2+ CD4 T cells                  | 8.4<br>(4.7, 15.7)   | 0.02  | 0.23 |
|                                                                          | TNF+ CD4 T cells                   | 20.1<br>(9.5, 33.5)  | 0.01  | 0.22 |
|                                                                          | CD107+ CD8 T cells                 | 6.9<br>(3.7, 11.5)   | 0.00  | 0.86 |
|                                                                          | IFN $\gamma$ + CD8 T cells         | 15.4<br>(8.1, 22.8)  | 0.00  | 0.55 |
|                                                                          | IL-2+ CD8 T cells                  | 2.3<br>(1.2, 4.8)    | 0.00  | 0.89 |
|                                                                          | TNF+ CD8 T cells                   | 9.0<br>(3.3, 19.5)   | 0.01  | 0.45 |

|                                                                           |                                             |                      |       |      |
|---------------------------------------------------------------------------|---------------------------------------------|----------------------|-------|------|
| <b>T cell effector functions: specific subsets (proportion of parent)</b> | CD107-/IFN $\gamma$ -/IL2-/TNF- CD4 T cells | 71.7<br>(59.9, 77.7) | -0.01 | 0.11 |
|                                                                           | CD107-/IFN $\gamma$ -/IL2-/TNF+ CD4 T cells | 8.9<br>(4.6, 13.7)   | 0.01  | 0.45 |
|                                                                           | CD107-/IFN $\gamma$ -/IL2+/TNF- CD4 T cells | 1.4<br>(0.8, 1.9)    | 0.16  | 0.15 |
|                                                                           | CD107-/IFN $\gamma$ -/IL2+/TNF+ CD4 T cells | 5.2<br>(2.3, 10.0)   | 0.02  | 0.43 |
|                                                                           | CD107-/IFN $\gamma$ +/IL2-/TNF- CD4 T cells | 1.0<br>(0.4, 1.9)    | 0.04  | 0.46 |
|                                                                           | CD107-/IFN $\gamma$ +/IL2-/TNF+ CD4 T cells | 2.7<br>(1.2, 4.9)    | 0.03  | 0.20 |
|                                                                           | CD107-/IFN $\gamma$ +/IL2+/TNF- CD4 T cells | 0.08<br>(0.03, 0.15) | 0.30  | 0.56 |
|                                                                           | CD107-/IFN $\gamma$ +/IL2+/TNF+ CD4 T cells | 1.3<br>(0.5, 2.6)    | 0.06  | 0.20 |
|                                                                           | CD107+/IFN $\gamma$ -/IL2-/TNF- CD4 T cells | 3.2<br>(1.9, 5.9)    | 0.02  | 0.47 |
|                                                                           | CD107+/IFN $\gamma$ -/IL2-/TNF+ CD4 T cells | 0.3<br>(0.1, 0.9)    | 0.29  | 0.04 |
|                                                                           | CD107+/IFN $\gamma$ -/IL2+/TNF- CD4 T cells | 0.1<br>(0.07, 0.3)   | -0.00 | 1.00 |
|                                                                           | CD107+/IFN $\gamma$ -/IL2+/TNF+ CD4 T cells | 0.1<br>(0.06, 0.4)   | 0.27  | 0.21 |
|                                                                           | CD107+/IFN $\alpha$ +/IL2-/TNF- CD4 T cells | 0.04<br>(0.02, 0.09) | 1.30  | 0.33 |
|                                                                           | CD107+/IFN $\gamma$ +/IL2-/TNF+ CD4 T cells | 0.1<br>(0.04, 0.4)   | 0.29  | 0.09 |
|                                                                           | CD107+/IFN $\gamma$ +/IL2+/TNF- CD4 T cells | 0.01<br>(0.00, 0.01) | -1.54 | 0.74 |
|                                                                           | CD107+/IFN $\gamma$ +/IL2+/TNF+ CD4 T cells | 0.05<br>(0.02, 0.15) | 0.55  | 0.12 |
|                                                                           | CD107-/IFN $\gamma$ -/IL2-/TNF- CD8 T cells | 72.8<br>(66.5, 83.8) | -0.00 | 0.53 |
|                                                                           | CD107-/IFN $\gamma$ -/IL2-/TNF+ CD8 T cells | 1.2<br>(0.8, 2.8)    | 0.04  | 0.43 |
|                                                                           | CD107-/IFN $\gamma$ -/IL2+/TNF- CD8 T cells | 0.8<br>(0.5, 1.4)    | 0.09  | 0.50 |
|                                                                           | CD107-/IFN $\gamma$ -/IL2+/TNF+ CD8 T cells | 0.4<br>(0.1, 0.9)    | 0.04  | 0.72 |
|                                                                           | CD107-/IFN $\gamma$ +/IL2-/TNF- CD8 T cells | 5.8<br>(2.7, 8.6)    | 0.00  | 0.95 |
|                                                                           | CD107-/IFN $\gamma$ +/IL2-/TNF+ CD8 T cells | 4.8<br>(1.6, 10.1)   | 0.01  | 0.54 |
|                                                                           | CD107-/IFN $\gamma$ +/IL2+/TNF- CD8 T cells | 0.3<br>(0.1, 0.4)    | 0.20  | 0.53 |
|                                                                           | CD107-/IFN $\gamma$ +/IL2+/TNF+ CD8 T cells | 0.5<br>(0.2, 1.1)    | -0.01 | 0.91 |
|                                                                           | CD107+/IFN $\gamma$ -/IL2-/TNF- CD8 T cells | 4.6<br>(2.5, 7.8)    | -0.00 | 0.86 |

|  |                                             |                      |       |      |
|--|---------------------------------------------|----------------------|-------|------|
|  | CD107+/IFN $\gamma$ -/IL2-/TNF+ CD8 T cells | 0.06<br>(0.02, 0.22) | 0.25  | 0.62 |
|  | CD107+/IFN $\gamma$ -/IL2+/TNF- CD8 T cells | 0.08<br>(0.05, 0.12) | -0.17 | 0.43 |
|  | CD107+/IFN $\gamma$ -/IL2+/TNF+ CD8 T cells | 0.01<br>(0.00, 0.03) | -0.29 | 0.76 |
|  | CD107+/IFN $\gamma$ +/IL2-/TNF- CD8 T cells | 0.4<br>(0.2, 0.8)    | 0.15  | 0.42 |
|  | CD107+/IFN $\gamma$ +/IL2-/TNF+ CD8 T cells | 0.4<br>(0.2, 1.9)    | 0.07  | 0.25 |
|  | CD107+/IFN $\gamma$ +/IL2+/TNF- CD8 T cells | 0.03<br>(0.01, 0.04) | -0.73 | 0.66 |
|  | CD107+/IFN $\gamma$ +/IL2+/TNF+ CD8 T cells | 0.01<br>(0.00, 0.16) | -0.03 | 0.85 |

89

90 **Supplementary Table 2.** Univariate regression analysis of immunological variables on reservoir

91 outgrowth (IUPM), among females only.

|                                                                                  | Immune Characteristic             | Median (IQR)         | Regression Coefficient | P-value |
|----------------------------------------------------------------------------------|-----------------------------------|----------------------|------------------------|---------|
| <b>Soluble Immune Analytes (log<sub>10</sub> pg/ml, unless otherwise stated)</b> | IL-7                              | 0.6<br>(0.4, 0.8)    | 0.47                   | 0.09    |
|                                                                                  | IL-15                             | 0.5<br>(0.4, 0.5)    | -0.29                  | 0.66    |
|                                                                                  | CRP (log <sub>10</sub> ng/ml)     | 3.0<br>(2.6, 3.6)    | -0.09                  | 0.48    |
|                                                                                  | D-dimer (log <sub>10</sub> ng/ml) | 2.4<br>(2.3, 2.8)    | 0.05                   | 0.85    |
|                                                                                  | IL-10 (binary)                    | 0.3<br>(0.2, 0.6)    | -0.16                  | 0.43    |
|                                                                                  | IL-6                              | -0.1<br>(-0.3, 0.1)  | -0.14                  | 0.67    |
|                                                                                  | IP10                              | 2.0<br>(1.9, 2.1)    | 0.50                   | 0.25    |
|                                                                                  | CCL21                             | 2.3<br>(1.5, 2.6)    | -0.07                  | 0.65    |
|                                                                                  | MIG                               | 2.6<br>(2.4, 2.7)    | 0.01                   | 0.98    |
|                                                                                  | MIP-3 $\alpha$ (binary)           | 5.8<br>(3.7, 10.0)   | 0.03                   | 0.85    |
|                                                                                  | MIP-3 $\beta$                     | 1.9<br>(1.8, 2.0)    | 0.05                   | 0.93    |
| <b>T cell subsets (proportion CD3+ cells)</b>                                    | CD4+                              | 51.7<br>(42.7, 59.8) | 0.01                   | 0.48    |
|                                                                                  | CD8                               | 42.2<br>(32.8, 51.9) | 0.00                   | 0.53    |
| <b>CD4 T cell memory</b>                                                         | Naïve (CD28+/CD45RO-/CCR7+)       | 47.1<br>(32.6, 58.2) | 0.00                   | 0.97    |

|                                                                                       |                                    |                      |        |      |
|---------------------------------------------------------------------------------------|------------------------------------|----------------------|--------|------|
| <b>subsets<br/>(proportion<br/>CD4 T cells)</b>                                       | Central (CD28+/CD45RO+/CCR7+)      | 33.3<br>(22.0, 42.6) | 0.00   | 0.88 |
|                                                                                       | Effector (CD28-/CD45RO+/CCR7-)     | 1.88<br>(1.1, 5.9)   | 0.03   | 0.34 |
|                                                                                       | Transitional (CD28+/CD45RO+/CCR7-) | 6.97<br>(5.6, 11.5)  | 0.01   | 0.62 |
| <b>CD4 T cell<br/>activation<br/>(proportion<br/>CD4 T cells)</b>                     | CD69                               | 15.8<br>(12.3, 19.3) | -0.01  | 0.66 |
|                                                                                       | HLA-DR+/CD38+                      | 2.3<br>(1.6, 3.1)    | 0.13   | 0.11 |
|                                                                                       | CD69+/Ki-67+                       | 0.3<br>(0.2, 0.4)    | -0.02  | 0.94 |
|                                                                                       | CD69- /Ki-67+                      | 1.7<br>(1.1, 2.2)    | 0.03   | 0.57 |
|                                                                                       | Ki-67+                             | 1.9<br>(1.5, 2.5)    | 0.03   | 0.63 |
|                                                                                       | T regulatory cells                 | 1.9<br>(1.5, 2.7)    | 0.06   | 0.51 |
| <b>T cell<br/>exhaustion:<br/>summary<br/>subsets<br/>(proportion of<br/>parent)</b>  | CD57+ CD4 T cells                  | 2.3<br>(1.3, 5.6)    | 0.03   | 0.25 |
|                                                                                       | Lag-3+ CD4 T cells                 | 1.7<br>(1.0, 2.6)    | -0.03  | 0.57 |
|                                                                                       | PD-1+ CD4 T cells                  | 27.8<br>(19.5, 33.5) | 0.00   | 0.55 |
|                                                                                       | Tim-3+ CD4 T cells                 | 2.9<br>(1.7, 4.5)    | -0.04  | 0.36 |
|                                                                                       | CD57+ CD8 T cells                  | 26.1<br>(16.4, 36.8) | 0.00   | 0.67 |
|                                                                                       | Lag-3+ CD8 T cells                 | 0.4<br>(0.3, 0.6)    | 0.36   | 0.15 |
|                                                                                       | PD-1+ CD8 T cells                  | 22.0<br>(14.9, 26.9) | -0.01  | 0.17 |
|                                                                                       | Tim-3+ CD8 T cells                 | 12.4<br>(6.7, 16.6)  | 0.01   | 0.38 |
| <b>T cell<br/>exhaustion:<br/>specific<br/>subsets<br/>(proportion of<br/>parent)</b> | CD57-/Lag3-/PD1-/Tim3- CD4 T cells | 68.4<br>(62.1, 76.9) | 0.00   | 0.63 |
|                                                                                       | CD57-/Lag3-/PD1-/Tim3+ CD4 T cells | 1.5<br>(0.7, 2.6)    | -0.06  | 0.23 |
|                                                                                       | CD57-/Lag3-/PD1+/Tim3- CD4 T cells | 21.6<br>(16.8, 27.8) | 0.00   | 0.67 |
|                                                                                       | CD57-/Lag3-/PD1+/Tim3+ CD4 T cells | 0.8<br>(0.6, 1.3)    | -0.10  | 0.55 |
|                                                                                       | CD57-/Lag3+/PD1-/Tim3- CD4 T cells | 1.5<br>(0.6, 2.0)    | -0.03  | 0.64 |
|                                                                                       | CD57-/Lag3+/PD1-/Tim3+ CD4 T cells | 0.01<br>(0.00, 0.01) | -10.79 | 0.30 |
|                                                                                       | CD57-/Lag3+/PD1+/Tim3- CD4 T cells | 0.2<br>(0.1, 0.3)    | -0.53  | 0.44 |
|                                                                                       | CD57-/Lag3+/PD1+/Tim3+ CD4 T cells | 0.03<br>(0.01, 0.04) | -0.44  | 0.60 |

|                                  |                                    |                         |        |      |
|----------------------------------|------------------------------------|-------------------------|--------|------|
|                                  | CD57+/Lag3-/PD1-/Tim3- CD4 T cells | 0.5<br>(0.3, 1.4)       | 0.04   | 0.73 |
|                                  | CD57+/Lag3-/PD1-/Tim3+ CD4 T cells | 0.04<br>(0.02, 0.07)    | -0.88  | 0.43 |
|                                  | CD57+/Lag3-/PD1+/Tim3- CD4 T cells | 1.5<br>(0.7,4.0)        | 0.04   | 0.20 |
|                                  | CD57+/Lag3-/PD1+/Tim3+ CD4 T cells | 0.08<br>(0.03, 0.23)    | 0.13   | 0.41 |
|                                  | CD57+/Lag3+/PD1-/Tim3- CD4 T cells | 0.01<br>(0.00 0.02)     | -3.70  | 0.21 |
|                                  | CD57+/Lag3+/PD1-/Tim3+ CD4 T cells | 0.000<br>(0.000, 0.002) | 51.47  | 0.29 |
|                                  | CD57+/Lag3+/PD1+/Tim3- CD4 T cells | 0.01<br>(0.00, 0.02)    | -0.08  | 0.98 |
|                                  | CD57+/Lag3+/PD1+/Tim3+ CD4 T cells | 0.00<br>(0.00, 0.01)    | -14.03 | 0.36 |
|                                  | CD57-/Lag3-/PD1-/Tim3- CD8 T cells | 50.0<br>(41.4, 61.8)    | 0.00   | 0.89 |
|                                  | CD57-/Lag3-/PD1-/Tim3+ CD8 T cells | 6.6<br>(2.6, 9.6)       | 0.01   | 0.59 |
|                                  | CD57-/Lag3-/PD1+/Tim3- CD8 T cells | 13.1<br>(8.5, 18.4)     | -0.03  | 0.04 |
|                                  | CD57-/Lag3-/PD1+/Tim3+ CD8 T cells | 0.8<br>(0.4, 1.5)       | 0.02   | 0.90 |
|                                  | CD57-/Lag3+/PD1-/Tim3- CD8 T cells | 0.2<br>(0.1, 0.3)       | 0.41   | 0.28 |
|                                  | CD57-/Lag3+/PD1-/Tim3+ CD8 T cells | 0.03<br>(0.01, 0.04)    | 5.04   | 0.16 |
|                                  | CD57-/Lag3+/PD1+/Tim3- CD8 T cells | 0.09<br>(0.05, 0.14)    | 0.79   | 0.43 |
|                                  | CD57-/Lag3+/PD1+/Tim3+ CD8 T cells | 0.007<br>(0.003, 0.011) | 19.45  | 0.04 |
|                                  | CD57+/Lag3-/PD1-/Tim3- CD8 T cells | 16.9<br>(9.6, 22.5)     | 0.00   | 0.68 |
|                                  | CD57+/Lag3-/PD1-/Tim3+ CD8 T cells | 2.1<br>(0.8, 3.9)       | 0.02   | 0.46 |
|                                  | CD57+/Lag3-/PD1+/Tim3- CD8 T cells | 5.2<br>(3.0, 7.6)       | -0.01  | 0.75 |
|                                  | CD57+/Lag3-/PD1+/Tim3+ CD8 T cells | 0.4<br>(0.3, 1.2)       | 0.05   | 0.55 |
|                                  | CD57+/Lag3+/PD1-/Tim3- CD8 T cells | 0.04<br>(0.02, 0.07)    | 3.12   | 0.09 |
|                                  | CD57+/Lag3+/PD1-/Tim3+ CD8 T cells | 0.005<br>(0.000, 0.014) | 13.70  | 0.17 |
|                                  | CD57+/Lag3+/PD1+/Tim3- CD8 T cells | 0.04<br>(0.02, 0.05)    | 1.97   | 0.38 |
|                                  | CD57+/Lag3+/PD1+/Tim3+ CD8 T cells | 0.002<br>(0.000, 0.009) | 10.61  | 0.32 |
| <b>T cell effector function:</b> | CD107+ CD4 T cells                 | 4.2<br>(2.7, 9.0)       | 0.03   | 0.17 |



|                                                                           |                                             |                         |       |      |
|---------------------------------------------------------------------------|---------------------------------------------|-------------------------|-------|------|
| <b>summary subsets (proportion of parent)</b>                             | IFN $\gamma$ + CD4 T cells                  | 6.6<br>(2.7, 10.4)      | 0.02  | 0.08 |
|                                                                           | IL-2+ CD4 T cells                           | 8.4<br>(2.9, 13.1)      | 0.03  | 0.05 |
|                                                                           | TNF+ CD4 T cells                            | 20.0<br>(7.6, 31.9)     | 0.12  | 0.01 |
|                                                                           | CD107+ CD8 T cells                          | 7.7<br>(3.8, 12.1)      | 0.02  | 0.20 |
|                                                                           | IFN $\gamma$ + CD8 T cells                  | 15.0<br>(7.8, 23.1)     | 0.01  | 0.31 |
|                                                                           | IL-2+ CD8 T cells                           | 1.9<br>(1.2, 3.9)       | 0.12  | 0.01 |
|                                                                           | TNF+ CD8 T cells                            | 8.5<br>(3.2, 19.2)      | 0.02  | 0.05 |
| <b>T cell effector functions: specific subsets (proportion of parent)</b> | CD107-/IFN $\gamma$ -/IL2-/TNF- CD4 T cells | 72.6<br>(61.6, 79.9)    | -0.01 | 0.02 |
|                                                                           | CD107-/IFN $\gamma$ -/IL2-/TNF+ CD4 T cells | 8.9<br>(4.2, 13.7)      | 0.03  | 0.07 |
|                                                                           | CD107-/IFN $\gamma$ -/IL2+/TNF- CD4 T cells | 1.1<br>(0.7, 1.9)       | 0.17  | 0.13 |
|                                                                           | CD107-/IFN $\gamma$ -/IL2+/TNF+ CD4 T cells | 5.2<br>(1.3, 8.1)       | 0.03  | 0.11 |
|                                                                           | CD107-/IFN $\gamma$ +/IL2-/TNF- CD4 T cells | 1.0<br>(0.5, 1.9)       | -0.01 | 0.85 |
|                                                                           | CD107-/IFN $\gamma$ +/IL2-/TNF+ CD4 T cells | 2.8<br>(0.1, 4.6)       | 0.04  | 0.08 |
|                                                                           | CD107-/IFN $\gamma$ +/IL2+/TNF- CD4 T cells | 0.08<br>(0.03, 0.14)    | -0.16 | 0.77 |
|                                                                           | CD107-/IFN $\gamma$ +/IL2+/TNF+ CD4 T cells | 1.3<br>(0.4, 2.6)       | 0.10  | 0.06 |
|                                                                           | CD107+/IFN $\gamma$ -/IL2-/TNF- CD4 T cells | 3.2<br>(2.1, 5.5)       | 0.01  | 0.65 |
|                                                                           | CD107+/IFN $\gamma$ -/IL2-/TNF+ CD4 T cells | 0.3<br>(0.1, 0.9)       | 0.35  | 0.01 |
|                                                                           | CD107+/IFN $\gamma$ -/IL2+/TNF- CD4 T cells | 0.1<br>(0.1, 0.2)       | 1.69  | 0.05 |
|                                                                           | CD107+/IFN $\gamma$ -/IL2+/TNF+ CD4 T cells | 0.1<br>(0.0, 0.4)       | 0.43  | 0.04 |
|                                                                           | CD107+/IFN $\gamma$ +/IL2-/TNF- CD4 T cells | 0.04<br>(0.01, 0.10)    | -0.16 | 0.90 |
|                                                                           | CD107+/IFN $\gamma$ +/IL2-/TNF+ CD4 T cells | 0.15<br>(0.04, 0.42)    | 0.35  | 0.02 |
|                                                                           | CD107+/IFN $\gamma$ +/IL2+/TNF- CD4 T cells | 0.007<br>(0.002, 0.013) | -3.84 | 0.73 |
|                                                                           | CD107+/IFN $\gamma$ +/IL2+/TNF+ CD4 T cells | 0.04<br>(0.02, 0.21)    | 0.67  | 0.03 |
|                                                                           | CD107-/IFN $\gamma$ -/IL2-/TNF- CD8 T cells | 74.9<br>(67.3, 85.1)    | -0.01 | 0.13 |
|                                                                           | CD107-/IFN $\gamma$ -/IL2-/TNF+ CD8 T cells | 1.2<br>(0.8, 2.5)       | 0.15  | 0.02 |

|                                             |                      |       |      |
|---------------------------------------------|----------------------|-------|------|
| CD107-/IFN $\gamma$ -/IL2+/TNF- CD8 T cells | 0.7<br>(0.5, 1.1)    | 0.29  | 0.04 |
| CD107-/IFN $\gamma$ -/IL2+/TNF+ CD8 T cells | 0.3<br>(0.1, 0.7)    | 0.26  | 0.04 |
| CD107-/IFN $\gamma$ +/IL2-/TNF- CD8 T cells | 6.0<br>(2.5, 8.8)    | -0.01 | 0.52 |
| CD107-/IFN $\gamma$ +/IL2-/TNF+ CD8 T cells | 4.6<br>(1.7, 9.7)    | 0.02  | 0.17 |
| CD107-/IFN $\gamma$ +/IL2+/TNF- CD8 T cells | 0.3<br>(0.1, 0.4)    | 0.42  | 0.30 |
| CD107-/IFN $\gamma$ +/IL2+/TNF+ CD8 T cells | 0.5<br>(0.1, 1.0)    | 0.33  | 0.04 |
| CD107+/IFN $\gamma$ -/IL2-/TNF- CD8 T cells | 4.5<br>(2.6, 7.9)    | 0.01  | 0.67 |
| CD107+/IFN $\gamma$ -/IL2-/TNF+ CD8 T cells | 0.06<br>(0.02, 0.19) | 0.78  | 0.13 |
| CD107+/IFN $\gamma$ -/IL2+/TNF- CD8 T cells | 0.08<br>(0.05, 0.11) | 0.77  | 0.62 |
| CD107+/IFN $\gamma$ -/IL2+/TNF+ CD8 T cells | 0.01<br>(0.00, 0.02) | 4.42  | 0.09 |
| CD107+/IFN $\gamma$ +/IL2-/TNF- CD8 T cells | 0.4<br>(0.2, 1.0)    | 0.17  | 0.33 |
| CD107+/IFN $\gamma$ +/IL2-/TNF+ CD8 T cells | 0.3<br>(0.1, 1.7)    | 0.10  | 0.04 |
| CD107+/IFN $\gamma$ +/IL2+/TNF- CD8 T cells | 0.02<br>(0.01, 0.04) | 1.94  | 0.46 |
| CD107+/IFN $\gamma$ +/IL2+/TNF+ CD8 T cells | 0.04<br>(0.01, 0.16) | 0.63  | 0.08 |

92

93 **Supplementary Table 3.** Univariate regression analysis of immunological variables on reservoir

94 outgrowth (IUPM), among males only.

|                                                                                  | <b>Immune Characteristic</b>      | <b>Median</b>       | <b>Regression Coefficient</b> | <b>P-value</b> |
|----------------------------------------------------------------------------------|-----------------------------------|---------------------|-------------------------------|----------------|
| <b>Soluble Immune Analytes (log<sub>10</sub> pg/ml, unless stated otherwise)</b> | IL-7                              | 0.6<br>(0.3, 0.8)   | -0.28                         | 0.60           |
|                                                                                  | IL-15                             | 0.5<br>(0.4, 0.5)   | -0.55                         | 0.66           |
|                                                                                  | CRP (log <sub>10</sub> ng/ml)     | 3.3<br>(2.8, 3.5)   | -0.02                         | 0.96           |
|                                                                                  | D-dimer (log <sub>10</sub> ng/ml) | 2.1<br>(1.9, 2.3)   | 0.04                          | 0.92           |
|                                                                                  | IL-10 (binary)                    | 0.5<br>(0.2, 0.7)   | 0.17                          | 0.64           |
|                                                                                  | IL-6                              | -0.1<br>(-0.3, 0.0) | -0.18                         | 0.82           |
|                                                                                  | IP10                              | 2.0<br>(1.9, 2.2)   | -1.03                         | 0.23           |

|                                                                                      |                                    |                      |       |      |
|--------------------------------------------------------------------------------------|------------------------------------|----------------------|-------|------|
|                                                                                      | CCL21                              | 2.3<br>(1.5, 2.8)    | 0.34  | 0.24 |
|                                                                                      | MIG                                | 2.6<br>(2.4, 2.8)    | -0.30 | 0.57 |
|                                                                                      | MIP-3 $\alpha$ (binary)            | 6.4<br>(4.8, 12.8)   | 0.08  | 0.82 |
|                                                                                      | MIP-3 $\beta$                      | 1.9<br>(1.8, 2.0)    | -0.50 | 0.64 |
| <b>T cell subsets<br/>(proportion<br/>CD3+ cells)</b>                                | CD4+                               | 52.2<br>(42.6, 63.4) | -0.02 | 0.20 |
|                                                                                      | CD8                                | 39.2<br>(33.4, 51.3) | 0.03  | 0.11 |
| <b>CD4 T cell<br/>memory<br/>subsets<br/>(proportion<br/>CD4 T cells)</b>            | Naïve (CD28+/CD45RO-/CCR7+)        | 40.3<br>(23.2, 47.3) | 0.00  | 0.94 |
|                                                                                      | Central (CD28+/CD45RO+/CCR7+)      | 34.6<br>(30.4, 39.1) | 0.01  | 0.73 |
|                                                                                      | Effector (CD28-/CD45RO+/CCR7-)     | 3.4<br>(2.5, 6.1)    | -0.03 | 0.64 |
|                                                                                      | Transitional (CD28+/CD45RO+/CCR7-) | 9.8<br>(7.3, 15.5)   | 0.03  | 0.44 |
| <b>CD4 T cell<br/>activation<br/>(proportion<br/>CD4 T cells)</b>                    | CD69                               | 14.9<br>(9.9, 19.5)  | 0.03  | 0.20 |
|                                                                                      | HLA-DR+/CD38+                      | 2.2<br>(1.5, 3.7)    | -0.28 | 0.09 |
|                                                                                      | CD69+/Ki-67+                       | 0.3<br>(0.2, 0.6)    | 1.90  | 0.04 |
|                                                                                      | CD69- /Ki-67+                      | 1.7<br>(1.2, 2.4)    | 0.02  | 0.93 |
|                                                                                      | Ki-67+                             | 2.0<br>(1.4, 3.0)    | 0.07  | 0.69 |
|                                                                                      | T regulatory cells                 | 1.8<br>(1.4, 2.7)    | 0.01  | 0.96 |
| <b>T cell<br/>exhaustion:<br/>summary<br/>subsets<br/>(proportion of<br/>parent)</b> | CD57+ CD4 T cells                  | 4.1<br>(2.4, 5.5)    | 0.04  | 0.64 |
|                                                                                      | Lag-3+ CD4 T cells                 | 1.5<br>(1.0, 3.2)    | -0.03 | 0.87 |
|                                                                                      | PD-1+ CD4 T cells                  | 28.2<br>(21.0, 32.7) | 0.04  | 0.03 |
|                                                                                      | Tim-3+ CD4 T cells                 | 2.6<br>(1.9, 3.2)    | 0.24  | 0.31 |
|                                                                                      | CD57+ CD8 T cells                  | 29.7<br>(15.2, 33.6) | 0.02  | 0.10 |
|                                                                                      | Lag-3+ CD8 T cells                 | 0.6<br>(0.4, 0.9)    | -0.15 | 0.84 |
|                                                                                      | PD-1+ CD8 T cells                  | 20.0<br>(16.1, 22.0) | 0.05  | 0.13 |
|                                                                                      | Tim-3+ CD8 T cells                 | 8.6<br>(7.4, 10.2)   | 0.02  | 0.58 |
| <b>T cell<br/>exhaustion:</b>                                                        | CD57-/Lag3-/PD1-/Tim3- CD4 T cells | 66.4<br>(61.4, 74.4) | -0.04 | 0.03 |

|                                                    |                                    |                         |        |      |
|----------------------------------------------------|------------------------------------|-------------------------|--------|------|
| <b>specific subsets<br/>(proportion of parent)</b> | CD57-/Lag3-/PD1-/Tim3+ CD4 T cells | 1.3<br>(1.0, 1.7)       | 0.09   | 0.84 |
|                                                    | CD57-/Lag3-/PD1+/Tim3- CD4 T cells | 24.3<br>(18.9, 27.7)    | 0.04   | 0.04 |
|                                                    | CD57-/Lag3-/PD1+/Tim3+ CD4 T cells | 0.9<br>(0.4, 1.0)       | 0.63   | 0.13 |
|                                                    | CD57-/Lag3+/PD1-/Tim3- CD4 T cells | 1.1<br>(0.8, 2.7)       | -0.05  | 0.80 |
|                                                    | CD57-/Lag3+/PD1-/Tim3+ CD4 T cells | 0.003<br>(0.000, 0.011) | 38.85  | 0.41 |
|                                                    | CD57-/Lag3+/PD1+/Tim3- CD4 T cells | 0.2<br>(0.1, 0.3)       | 1.79   | 0.42 |
|                                                    | CD57-/Lag3+/PD1+/Tim3+ CD4 T cells | 0.01<br>(0.00, 0.02)    | 5.90   | 0.51 |
|                                                    | CD57+/Lag3-/PD1-/Tim3- CD4 T cells | 1.0<br>(0.5, 1.4)       | -0.06  | 0.69 |
|                                                    | CD57+/Lag3-/PD1-/Tim3+ CD4 T cells | 0.06<br>(0.02, 0.12)    | -0.05  | 0.95 |
|                                                    | CD57+/Lag3-/PD1+/Tim3- CD4 T cells | 3.0<br>(1.6, 3.9)       | 0.29   | 0.10 |
|                                                    | CD57+/Lag3-/PD1+/Tim3+ CD4 T cells | 0.08<br>(0.04, 0.15)    | 1.08   | 0.41 |
|                                                    | CD57+/Lag3+/PD1-/Tim3- CD4 T cells | 0.01<br>(0.007, 0.02)   | -15.44 | 0.46 |
|                                                    | CD57+/Lag3+/PD1-/Tim3+ CD4 T cells | 0<br>(0, 0.001)         | -32.64 | 0.40 |
|                                                    | CD57+/Lag3+/PD1+/Tim3- CD4 T cells | 0.01<br>(0.01, 0.02)    | 11.76  | 0.61 |
|                                                    | CD57+/Lag3+/PD1+/Tim3+ CD4 T cells | 0.002<br>(0.000, 0.005) | 101.14 | 0.10 |
|                                                    | CD57-/Lag3-/PD1-/Tim3- CD8 T cells | 53.0<br>(49.7, 57.1)    | -0.04  | 0.02 |
|                                                    | CD57-/Lag3-/PD1-/Tim3+ CD8 T cells | 4.42<br>(3.4, 5.0)      | 0.04   | 0.75 |
|                                                    | CD57-/Lag3-/PD1+/Tim3- CD8 T cells | 10.9<br>(9.8, 13.9)     | 0.01   | 0.76 |
|                                                    | CD57-/Lag3-/PD1+/Tim3+ CD8 T cells | 0.9<br>(0.6, 1.4)       | 0.27   | 0.29 |
|                                                    | CD57-/Lag3+/PD1-/Tim3- CD8 T cells | 0.2<br>(0.1, 0.3)       | -1.47  | 0.37 |
|                                                    | CD57-/Lag3+/PD1-/Tim3+ CD8 T cells | 0.03<br>(0.01, 0.05)    | -5.52  | 0.59 |
|                                                    | CD57-/Lag3+/PD1+/Tim3- CD8 T cells | 0.09<br>(0.05, 0.24)    | 0.56   | 0.75 |
|                                                    | CD57-/Lag3+/PD1+/Tim3+ CD8 T cells | 0.01<br>(0.00, 0.03)    | 4.53   | 0.72 |
|                                                    | CD57+/Lag3-/PD1-/Tim3- CD8 T cells | 20.1<br>(9.9, 23.9)     | 0.03   | 0.14 |
|                                                    | CD57+/Lag3-/PD1-/Tim3+ CD8 T cells | 1.9<br>(1.3, 2.9)       | 0.01   | 0.80 |

|                                                                           |                                             |                         |       |      |
|---------------------------------------------------------------------------|---------------------------------------------|-------------------------|-------|------|
|                                                                           | CD57+/Lag3-/PD1+/Tim3- CD8 T cells          | 5.1<br>(3.8, 7.0)       | 0.14  | 0.04 |
|                                                                           | CD57+/Lag3-/PD1+/Tim3+ CD8 T cells          | 0.7<br>(0.4, 1.4)       | 0.16  | 0.72 |
|                                                                           | CD57+/Lag3+/PD1-/Tim3- CD8 T cells          | 0.07<br>(0.05, 0.14)    | 0.84  | 0.83 |
|                                                                           | CD57+/Lag3+/PD1-/Tim3+ CD8 T cells          | 0.002<br>(0.000, 0.017) | 6.58  | 0.66 |
|                                                                           | CD57+/Lag3+/PD1+/Tim3- CD8 T cells          | 0.05<br>(0.03, 0.09)    | 0.71  | 0.90 |
|                                                                           | CD57+/Lag3+/PD1+/Tim3+ CD8 T cells          | 0.004<br>(0.000, 0.007) | 3.19  | 0.85 |
| <b>T cell effector functions: summary subsets (proportion of parent)</b>  | CD107+ CD4 T cells                          | 4.4<br>(2.2, 9.4)       | 0.01  | 0.88 |
|                                                                           | IFN $\gamma$ + CD4 T cells                  | 6.8<br>(4.1, 11.0)      | 0.01  | 0.75 |
|                                                                           | IL-2+ CD4 T cells                           | 11.1<br>(6.6, 17.7)     | -0.03 | 0.35 |
|                                                                           | TNF+ CD4 T cells                            | 24.6<br>(10.9, 36.7)    | -0.01 | 0.44 |
|                                                                           | CD107+ CD8 T cells                          | 6.6<br>(3.8, 8.8)       | -0.03 | 0.35 |
|                                                                           | IFN $\gamma$ + CD8 T cells                  | 15.5<br>(8.2, 21.7)     | -0.01 | 0.72 |
|                                                                           | IL-2+ CD8 T cells                           | 4.3<br>(1.6, 5.8)       | -0.13 | 0.02 |
|                                                                           | TNF+ CD8 T cells                            | 14.3<br>(3.7, 24.3)     | -0.02 | 0.28 |
| <b>T cell effector functions: specific subsets (proportion of parent)</b> | CD107-/IFN $\gamma$ -/IL2-/TNF- CD4 T cells | 69.0<br>(54.8, 74.3)    | 0.01  | 0.52 |
|                                                                           | CD107-/IFN $\gamma$ -/IL2-/TNF+ CD4 T cells | 9.5<br>(5.8, 13.0)      | -0.03 | 0.39 |
|                                                                           | CD107-/IFN $\gamma$ -/IL2+/TNF- CD4 T cells | 1.6<br>(1.0, 1.8)       | -0.03 | 0.94 |
|                                                                           | CD107-/IFN $\gamma$ -/IL2+/TNF+ CD4 T cells | 7.1<br>(2.9, 11.8)      | -0.05 | 0.27 |
|                                                                           | CD107-/IFN $\gamma$ +/IL2-/TNF- CD4 T cells | 0.9<br>(0.3, 1.9)       | 0.30  | 0.05 |
|                                                                           | CD107-/IFN $\gamma$ +/IL2-/TNF+ CD4 T cells | 2.5<br>(1.3, 5.9)       | -0.01 | 0.87 |
|                                                                           | CD107-/IFN $\gamma$ +/IL2+/TNF- CD4 T cells | 0.09<br>(0.02, 0.14)    | 1.07  | 0.35 |
|                                                                           | CD107-/IFN $\gamma$ +/IL2+/TNF+ CD4 T cells | 1.0<br>(0.5, 2.6)       | -0.01 | 0.90 |
|                                                                           | CD107+/IFN $\gamma$ -/IL2-/TNF- CD4 T cells | 3.0<br>(1.5, 7.5)       | 0.01  | 0.78 |
|                                                                           | CD107+/IFN $\gamma$ -/IL2-/TNF+ CD4 T cells | 0.4<br>(0.2, 0.6)       | 0.11  | 0.77 |
|                                                                           | CD107+/IFN $\gamma$ -/IL2+/TNF- CD4 T cells | 0.3<br>(0.1, 0.3)       | -0.62 | 0.28 |

|                                             |                       |       |      |
|---------------------------------------------|-----------------------|-------|------|
| CD107+/IFN $\gamma$ -/IL2+/TNF+ CD4 T cells | 0.2<br>(0.1, 0.4)     | -0.48 | 0.43 |
| CD107+/IFN $\gamma$ +/IL2-/TNF- CD4 T cells | 0.05<br>(0.03, 0.06)  | 6.07  | 0.07 |
| CD107+/IFN $\gamma$ +/IL2-/TNF+ CD4 T cells | 0.12<br>(0.04, 0.35)  | 0.12  | 0.92 |
| CD107+/IFN $\gamma$ +/IL2+/TNF- CD4 T cells | 0.01<br>(0.01, 0.016) | -3.89 | 0.56 |
| CD107+/IFN $\gamma$ +/IL2+/TNF+ CD4 T cells | 0.07<br>(0.04, 0.11)  | -0.47 | 0.89 |
| CD107-/IFN $\gamma$ -/IL2-/TNF- CD8 T cells | 67.6<br>(66.0, 82.6)  | 0.02  | 0.27 |
| CD107-/IFN $\gamma$ -/IL2-/TNF+ CD8 T cells | 2.3<br>(0.8, 3.2)     | -0.11 | 0.25 |
| CD107-/IFN $\gamma$ -/IL2+/TNF- CD8 T cells | 1.0<br>(0.5, 2.0)     | -0.42 | 0.11 |
| CD107-/IFN $\gamma$ -/IL2+/TNF+ CD8 T cells | 0.6<br>(0.2, 0.9)     | -0.31 | 0.11 |
| CD107-/IFN $\gamma$ +/IL2-/TNF- CD8 T cells | 5.2<br>(3.9, 6.9)     | 0.04  | 0.37 |
| CD107-/IFN $\gamma$ +/IL2-/TNF+ CD8 T cells | 6.4<br>(1.4, 12.1)    | -0.01 | 0.61 |
| CD107-/IFN $\gamma$ +/IL2+/TNF- CD8 T cells | 0.4<br>(0.1, 0.6)     | -0.22 | 0.69 |
| CD107-/IFN $\gamma$ +/IL2+/TNF+ CD8 T cells | 0.8<br>(0.4, 1.7)     | -0.40 | 0.04 |
| CD107+/IFN $\gamma$ -/IL2-/TNF- CD8 T cells | 4.7<br>(1.7, 7.2)     | -0.03 | 0.47 |
| CD107+/IFN $\gamma$ -/IL2-/TNF+ CD8 T cells | 0.09<br>(0.04, 0.23)  | -1.19 | 0.29 |
| CD107+/IFN $\gamma$ -/IL2+/TNF- CD8 T cells | 0.10<br>(0.05, 0.31)  | -0.32 | 0.25 |
| CD107+/IFN $\gamma$ -/IL2+/TNF+ CD8 T cells | 0.03<br>(0.01, 0.05)  | -1.36 | 0.29 |
| CD107+/IFN $\gamma$ +/IL2-/TNF- CD8 T cells | 0.3<br>(0.2, 0.7)     | 0.40  | 0.59 |
| CD107+/IFN $\gamma$ +/IL2-/TNF+ CD8 T cells | 0.6<br>(0.2, 2.1)     | -0.20 | 0.35 |
| CD107+/IFN $\gamma$ +/IL2+/TNF- CD8 T cells | 0.02<br>(0.02, 0.06)  | -3.20 | 0.20 |
| CD107+/IFN $\gamma$ +/IL2+/TNF+ CD8 T cells | 0.08<br>(0.04, 0.27)  | -0.25 | 0.30 |

95  
96

97

98

99

100 References

- 101 1. Siliciano JD, Siliciano RF. Enhanced culture assay for detection and quantitation of  
102 latently infected, resting CD4+ T-cells carrying replication-competent virus in HIV-1-  
103 infected individuals. *Methods Mol Biol.* 2005;304:3–15.
- 104 2. Rosenbloom DI, Elliott O, Hill AL, Henrich TJ, Siliciano JM, Siliciano RF. Designing and  
105 interpreting limiting dilution assays: general principles and applications to the latent  
106 reservoir for human immunodeficiency virus-1. *Open Forum Infect Dis.* 2015;2(4):ofv123.
- 107 3. Massanella M, Gianella S, Lada SM, Richman DD, Strain MC. Quantification of Total  
108 and 2-LTR (Long terminal repeat) HIV DNA, HIV RNA and Herpesvirus DNA in PBMCs.  
109 *Bio Protoc.* 2015;5(11):e1492.
- 110 4. Wonderlich ER, Subramanian K, Cox B, Wiegand A, Lackman-Smith C, Bale MJ, Stone  
111 M, Hoh R, Kearney MF, Maldarelli F, Deeks SG. Effector memory differentiation  
112 increases detection of replication-competent HIV-I in resting CD4+ T cells from virally  
113 suppressed individuals. *PLoS pathog.* 2019;15(10):e1008074.
- 114 5. Redd AD, Collinson-Streng A, Martens C, Ricklefs S, Mullis CE, Manucci J, Tobian AA,  
115 Selig EJ, Laeyendecker O, Sewankambo N, Gray RH. Identification of HIV  
116 superinfection in seroconcordant couples in Rakai, Uganda, by use of next-generation  
117 deep sequencing. *J Clin Microbiol.* 2011;49(8):2859–67.
